# Supplementary material for: High-throughput single nucleus total RNA sequencing of formalin-fixed paraffin-embedded tissues by snRandom-seq
Source: Springer Nature journal article supplement (doi:10.1038/s41467-023-38409-5), 2023-05-12
Supplement: MOESM1 [file 41467_2023_38409_MOESM1_ESM.pdf]

## Supplementary Information

### High-throughput single nucleus total RNA sequencing of formalin-fixed paraffin-embedded tissues by snRandom-seq

Ziye Xu<sup>1,2#</sup>, Tianyu Zhang<sup>3#</sup>, Hongyu Chen<sup>4,5,6#</sup>, Yuyi Zhu<sup>2</sup>, Yuexiao Lv<sup>2</sup>, Shunji Zhang<sup>7</sup>, Jiaye Chen<sup>8</sup>, Haide Chen<sup>2</sup>, Lili Yang<sup>9</sup>, Weiqin Jiang<sup>10</sup>, Shengyu Ni<sup>3</sup>, Fangru Lu<sup>3</sup>, Zhaolun Wang<sup>3</sup>, Hao Yang<sup>3</sup>, Ling Dong<sup>3</sup>, Feng Chen<sup>9</sup>, Hong Zhang<sup>7,11</sup>, Yu Chen<sup>1</sup>, Jiong Liu<sup>3</sup>, Dandan Zhang<sup>12,13</sup>, Longjiang Fan<sup>4,5,6\*</sup>, Guoji Guo<sup>2\*</sup>, Yongcheng Wang<sup>1,2,7\*</sup>

<sup>1</sup>Department of Laboratory Medicine, the First Affiliated Hospital, Zhejiang University School of Medicine, Hangzhou, China

<sup>2</sup>Liangzhu Laboratory, Zhejiang University Medical Center, Hangzhou, China

<sup>3</sup>M20 Genomics, Hangzhou, China

<sup>4</sup>School of Medicine, Hangzhou City University, Hangzhou, China

<sup>5</sup>Institute of Bioinformatics, Zhejiang University, Hangzhou, China

<sup>6</sup>James D. Watson Institute of Genome Sciences, Zhejiang University, Hangzhou, China

<sup>7</sup>College of Biomedical Engineering and Instrument Science, Zhejiang University, Hangzhou, China

<sup>8</sup>Department of Biomedical Informatics, Harvard Medical School, Boston, United States

<sup>9</sup>Department of Radiology, the First Affiliated Hospital, Zhejiang University School of Medicine, Hangzhou, China.

<sup>10</sup>Departments of Colorectal Surgery, the First Affiliated Hospital, Zhejiang University, Hangzhou, China

<sup>11</sup>Department of Nuclear Medicine and PET/CT Center, the Second Affiliated Hospital, Zhejiang University School of Medicine, Hangzhou, China

<sup>12</sup>Department of Pathology, and Department of Medical Oncology of the Second Affiliated Hospital,

Zhejiang University School of Medicine, Hangzhou, Zhejiang, China

<sup>13</sup>Department of Pathology, Key Laboratory of Disease Proteomics of Zhejiang Province, School of Medicine, Zhejiang University, Hangzhou, China

# These authors contributed equally to this work.

\*Corresponding Author: Yongcheng Wang (yongcheng@zju.edu.cn), Guoji Guo(ggj@zju.edu.cn), and Longjiang Fan (fanlj@zju.edu.cn).

## Supplementary Figures

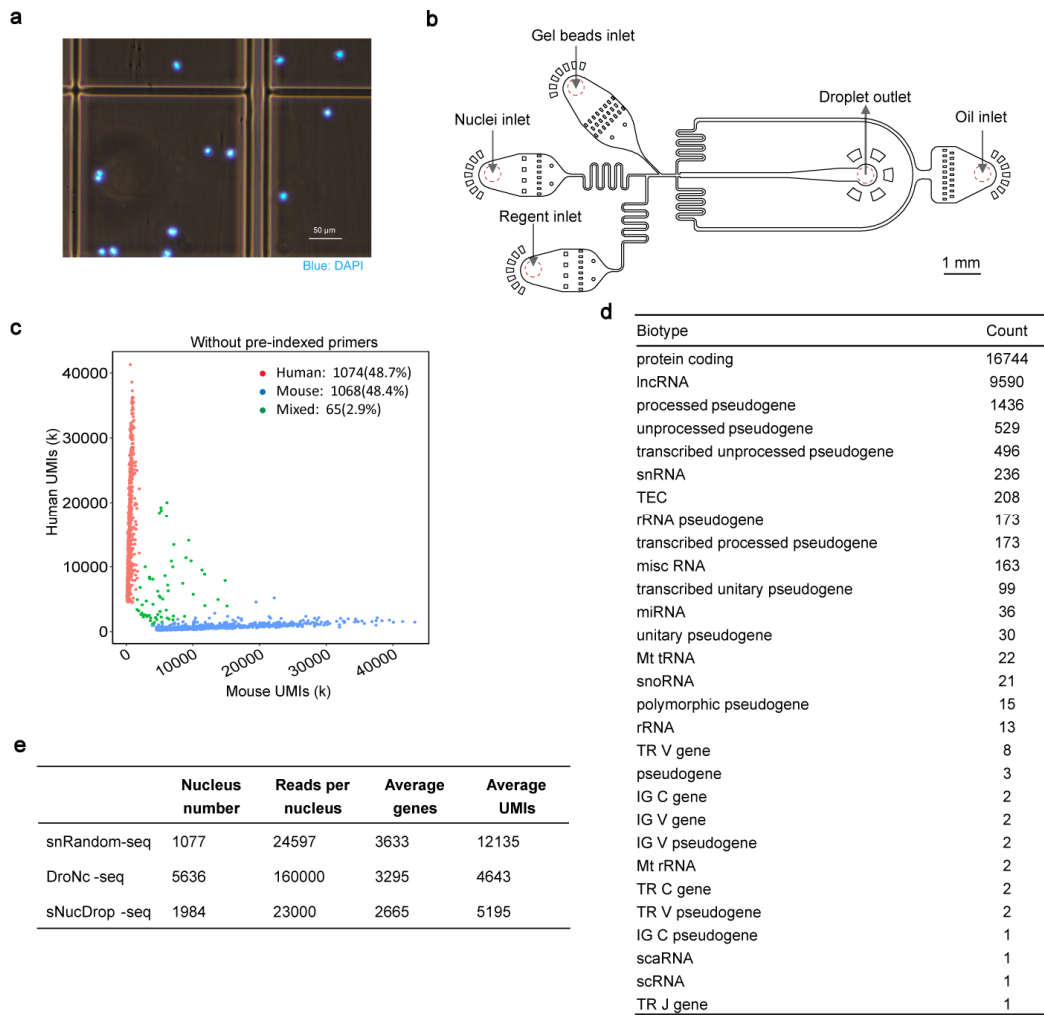

**Supplementary Figure 1. Establishment of cell encapsulation platform and high-sensitivity snRNA-seq data from a human-mouse mixture sample by snRandom-seq**

**a**, Image of DAPI-stained 293T and 3T3 nuclei before cell encapsulation. Scale bar: 50  $\mu$ m. **b**, Design of the device for cell, bead and mix reagents encapsulation. **c**, Species-mixing scatter plot shows the single-nuclei capture efficiency and doublet rate of snRandom-seq without pre-indexed random primers. **d**, Counts of biotypes detected by snRandom-seq in the 293T nuclei. **e**, Sensitivity comparison among snRandom-seq, DroNc-seq<sup>1</sup> and sNucDrop-seq<sup>2</sup>.

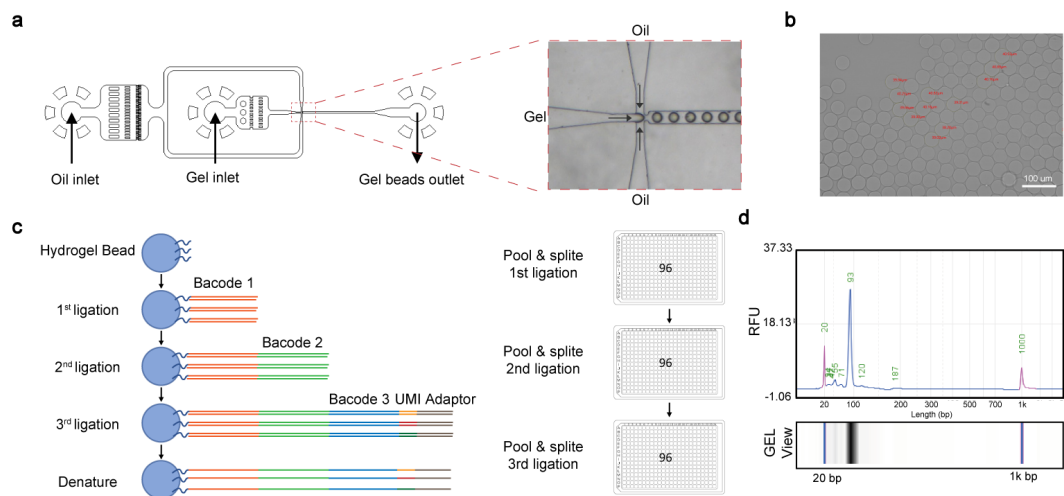

### Supplementary Figure 2. Generation of barcode beads

**a**, Design of the device for hydrogel beads generation. **b**, Image of hydrogel beads. Scal bar: 100  $\mu\text{m}$ . **c**, Overview of barcode synthesis process. **d**, Electropherogram of released primers for Qsep100™ DNA Fragment Analyzer. Lower marker: 20 bp; upper marker: 1k bp.

**a**

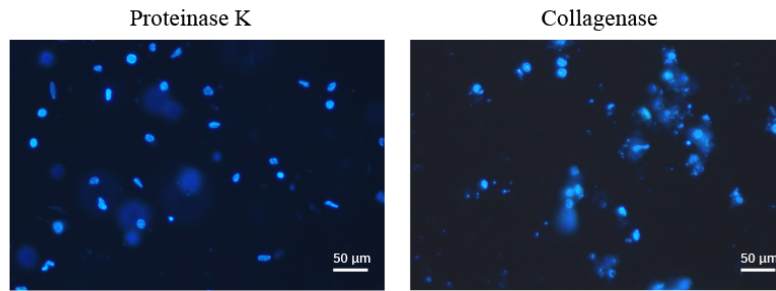

**Supplementary Figure 3. Nuclei isolated from FFPE mouse kidney by Proteinase K and Collagenase.**

**a**, DAPI images of nuclei isolated from FFPE mouse kidney by Proteinase K (0.5 mg/ml) and Collagenase (1.5 mg/ml). Scale bar, 50  $\mu$ m.

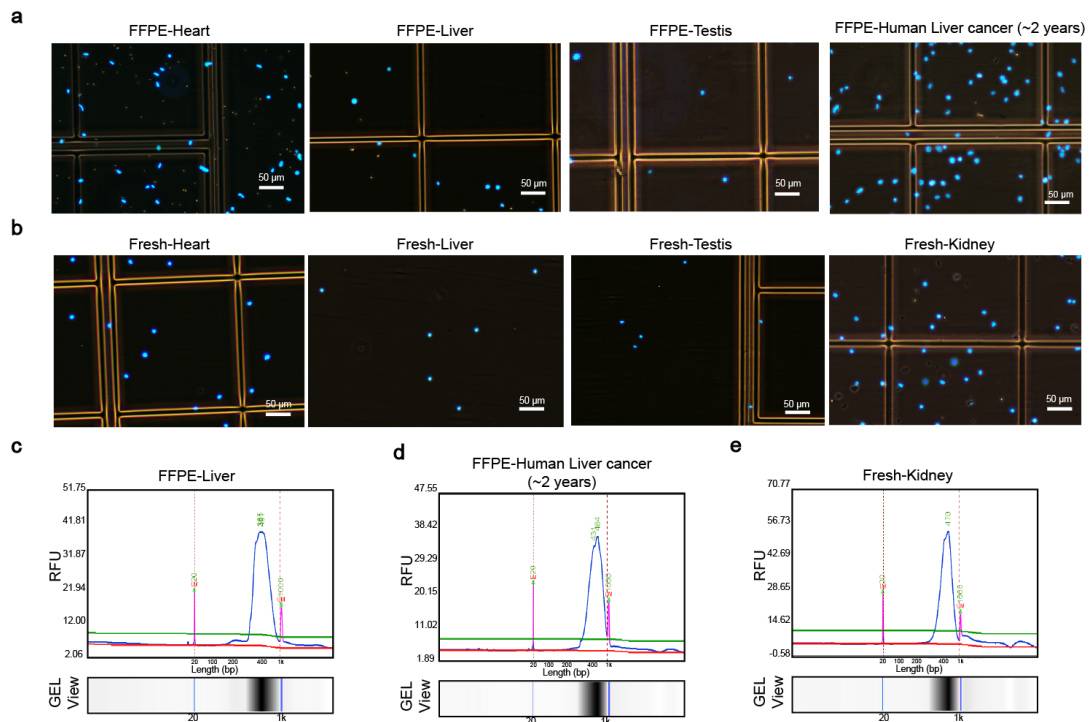

**Supplementary Figure 4. Single nuclei and cDNA libraries generated by snRandom-seq from FFPE and fresh samples.**

**a**, DAPI images of nuclei isolated from FFPE mouse tissues, including heart, liver, testis, and an about 2-year-old FFPE human liver cancer. Scale bar, 50  $\mu$ m. **b**, DAPI images of nuclei isolated from fresh mouse tissues, including heart, liver, testis, kidney. Scale bar, 50  $\mu$ m. **c-e**, Electropherogram of cDNA libraries from FFPE mouse liver (**c**), FFPE human liver cancer (**d**), and fresh mouse kidney(**e**). Lower marker: 20 bp; upper marker: 1k bp.

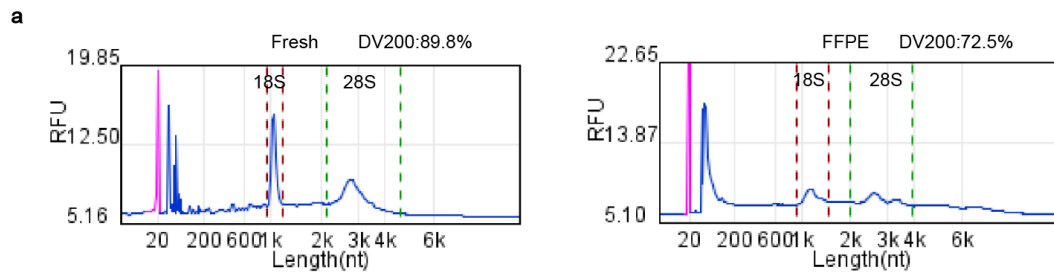

**Supplementary Figure 5. Comparison of the RNA quality of FFPE and fresh samples.**

**a**, Electropherogram of RNAs isolated from FFPE mouse testis and fresh mouse testis. DV200 value, the percentage of fragments >200 nucleotides.

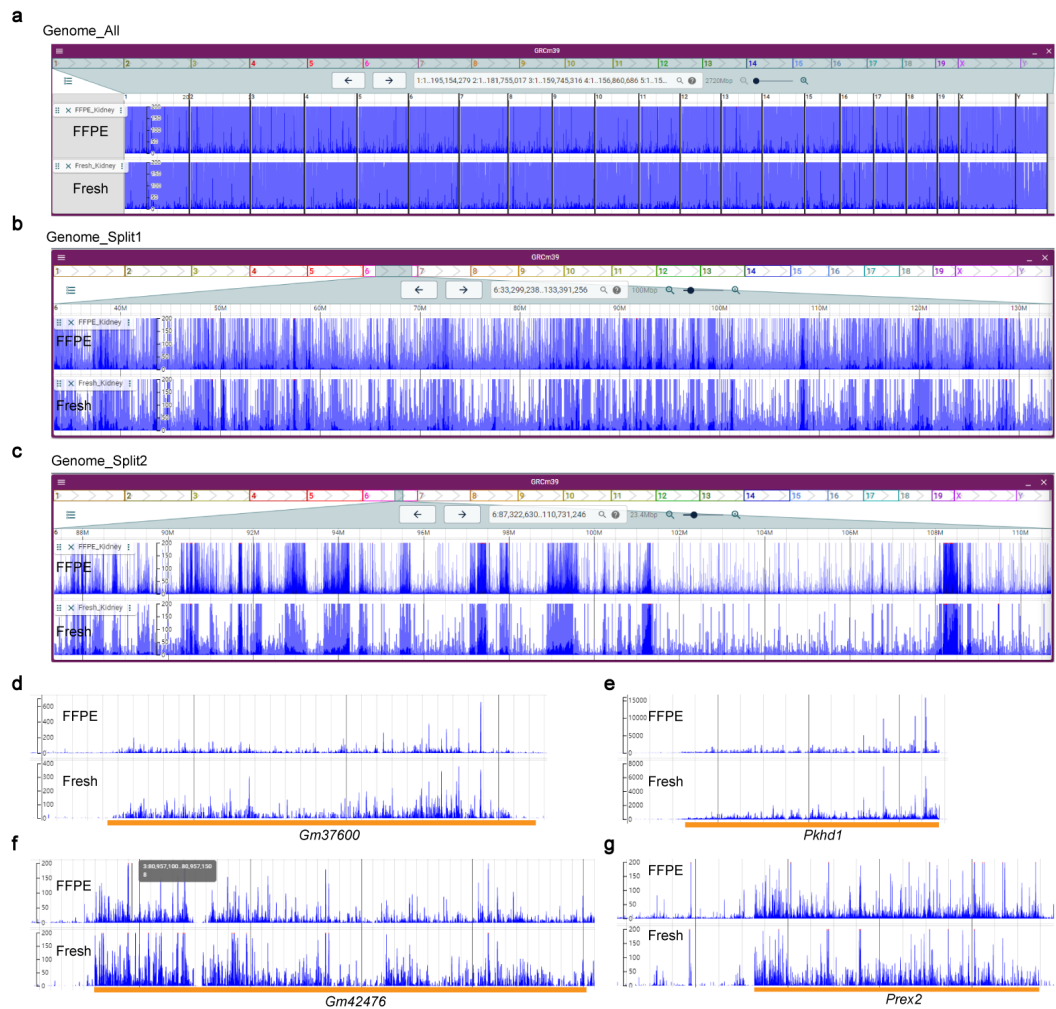

**Supplementary Figure 6. Comparison of the genome coverage of FFPE and fresh single nuclei RNA profiles by snRandom-seq.**

**a-c**, The whole (**a**) and split (**b**, **c**) merged genome browser tracks visualized by JBrowse. **d-g**, The reads distribution of four randomly selected genes (*Gm37600*, *Pkhd1*, *Gm42476*, and *Prex2*) in the merged genome browser track visualized by JBrowse.



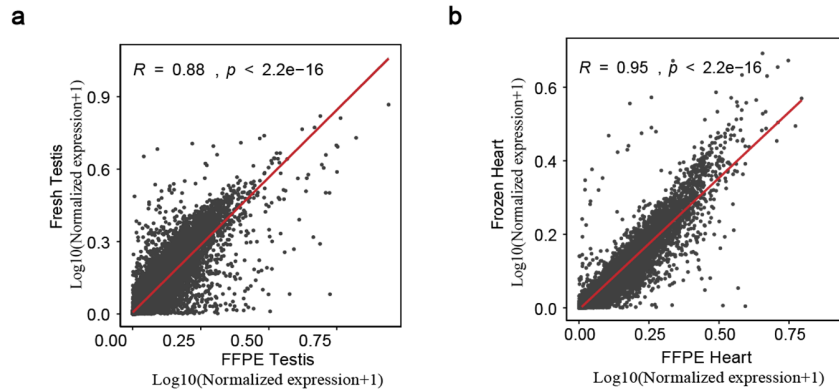

**Supplementary Figure 7. Comparison of the gene expression of FFPE and fresh samples by snRandom-seq**

**a, b,** The Pearson's correlation coefficient ( $R$ ) of the normalized gene expressions between FFPE/fresh mouse testis samples (**a**) and mouse heart samples (**b**). Each dot represents the average expression level of a gene. The red line indicates the linear regression line.  $p$ -value ( $p$ ) was computed from two-sided permutation test. FFPE testis nuclei:  $n = 3865$ . Fresh testis nuclei:  $n = 1795$ . FFPE heart nuclei:  $n = 6942$ . Frozen heart nuclei:  $n = 10974$ .

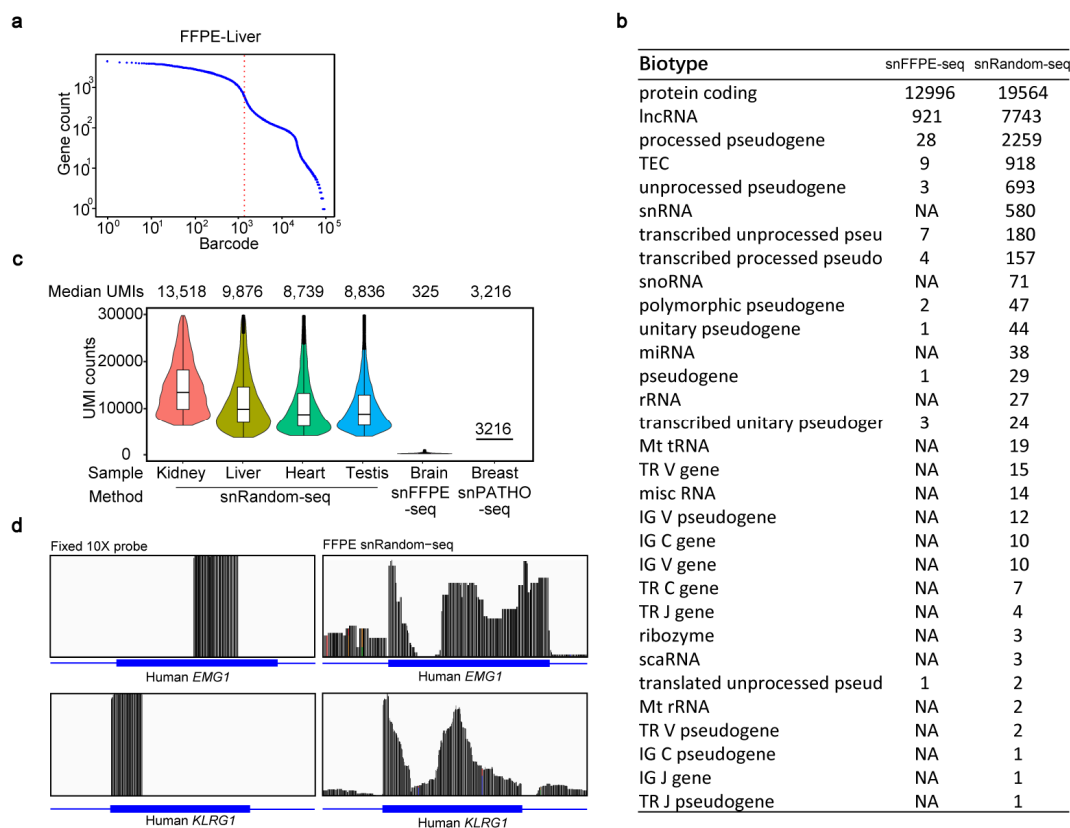

**Supplementary Figure 8. snRNA-seq data from FFPE mouse samples by snRandom-seq**

**a**, Barcode-gene count plot of FFPE mouse liver. Barcodes of FFPE mouse liver single nucleus were ordered from the largest to smallest gene counts. **b**, Counts of different biotypes detected in FFPE mouse liver by snRandom-seq and mouse brain by snFFPE-seq<sup>3</sup>. **c**, Distribution of UMI counts detected from different FFPE tissues, including mouse tissues (heart, kidney, testis and liver) and human liver cancer using snRandom-seq, comparing with the mouse brain using snFFPE-seq<sup>3</sup> and breast cancer using snPATHO-seq<sup>4</sup>. Kidney nuclei:  $n=5,795$ , liver nuclei:  $n=4,287$ , heart nuclei:  $n=6,732$ , testis nuclei:  $n=3,774$ , brain nuclei:  $n=7,031$ , breast nuclei:  $n=5,721$ . Data are presented as median values. Data in the box plot correspond to the first (lower hinges) quartiles, third quartiles (upper hinges), and median (center). The upper whisker extends from the hinge to the maxima no further than  $1.5 \times \text{IQR}$  from the hinge. The lower whisker extends from the hinge to the minima at most  $1.5 \times \text{IQR}$  of the hinge. **d**, Representative raw reads aligned to human genes (*EMG1* and *KLRG1*) generated by snRandom-seq and 10X Chromium Fixed RNA Profiling.

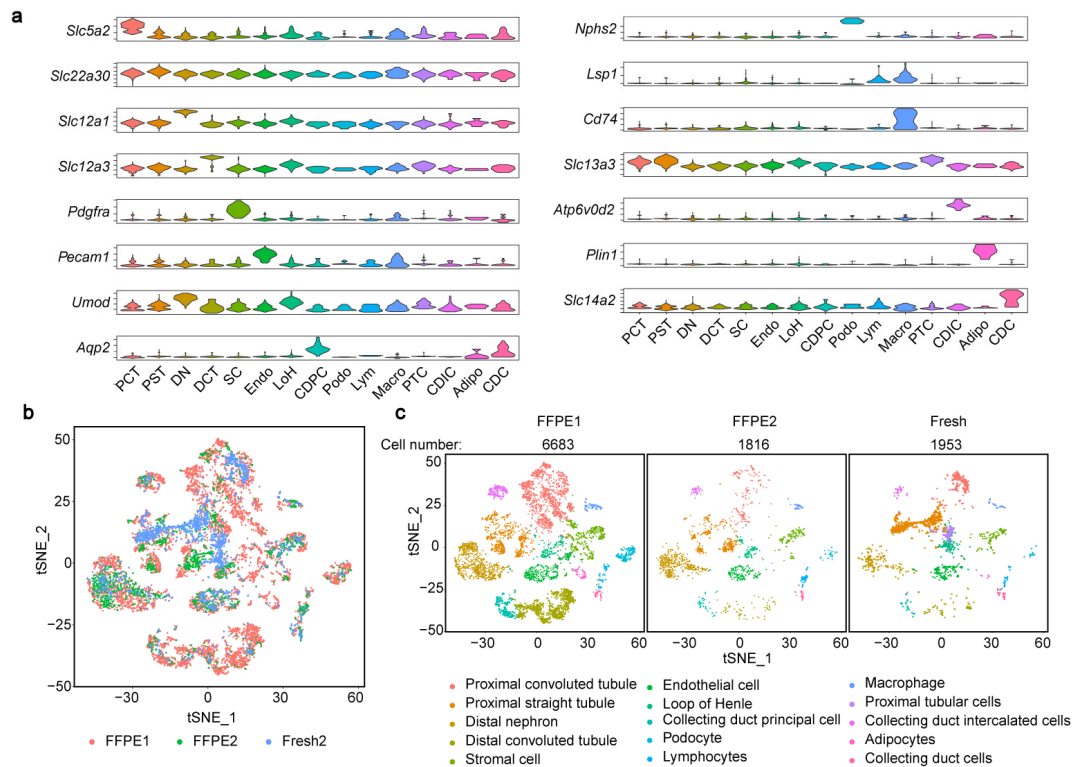

**Supplementary Figure 9. Comparison of FFPE and fresh samples from the same tissue by snRandom-seq**

**a**, Gene expressions of known marker genes for cell type identification. **b**, tSNE map of integrated snRandom-seq data of FFPE1, FFPE2 and fresh sample. Each colored point refers to a sample of the three kinds of samples. **c**, The integrated tSNE map contributed by snRandom-seq data from FFPE1, FFPE2 and fresh sample, respectively. Cell types annotated from the integrated snRandom-seq data shown below.

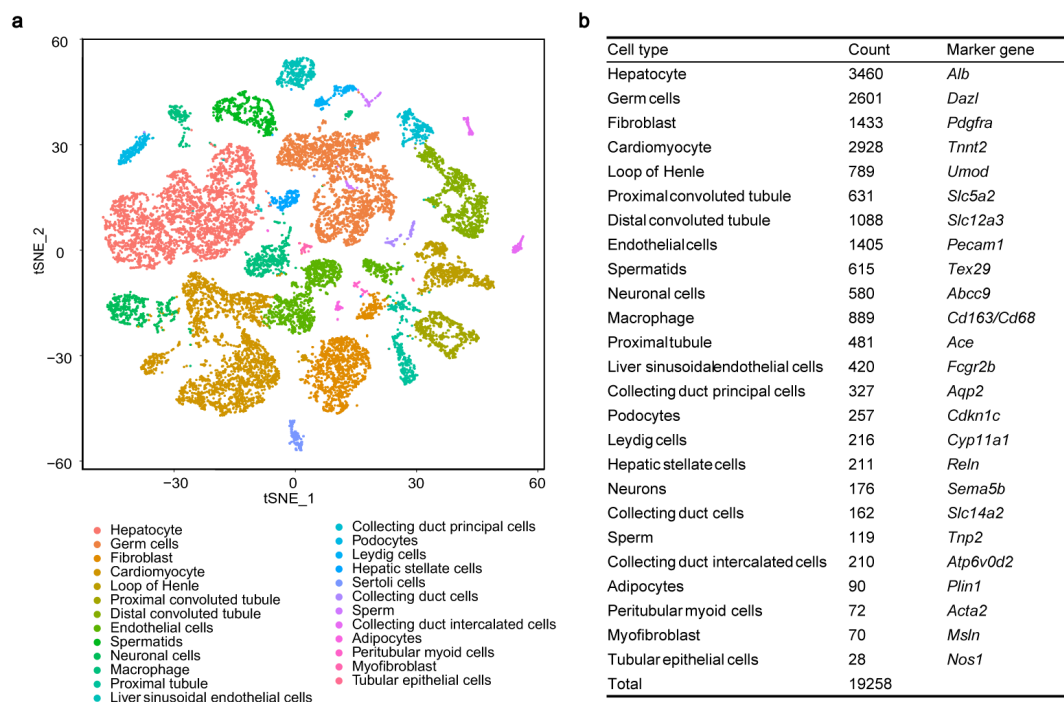

**Supplementary Figure 10. Cell atlas identified by snRandom-seq in multiple different FFPE mouse tissues**

**a**, tSNE map of integrated snRandom-seq data of FFPE mouse tissue sample (heart, liver, kidney and testis). Each colored point refers to different identified cell types. **b**, Cell numbers of different identified cell types and known marker genes.

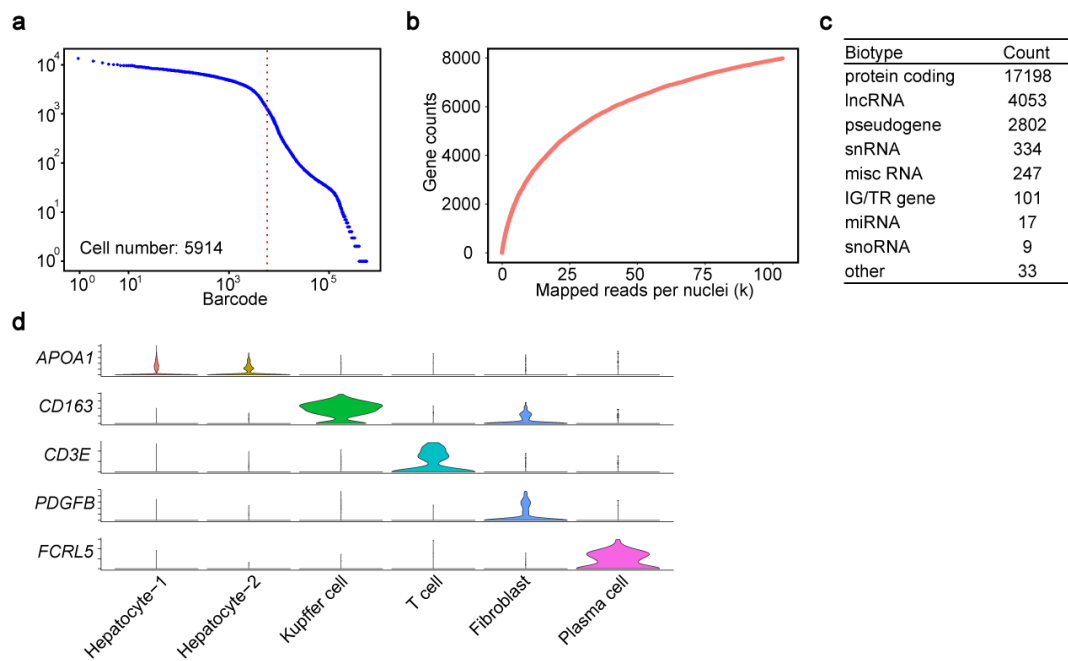

**Supplementary Figure 11. snRandom-seq identified cell types in clinical FFPE sample**

**a**, Barcode-gene count plot of FFPE human liver cancer sample. **b**, Saturation analysis of snRandom-seq based on the sample. **c**, Counts of different biotypes detected in the sample by snRandom-seq. **d**, Gene expressions of known marker genes for cell type identification.

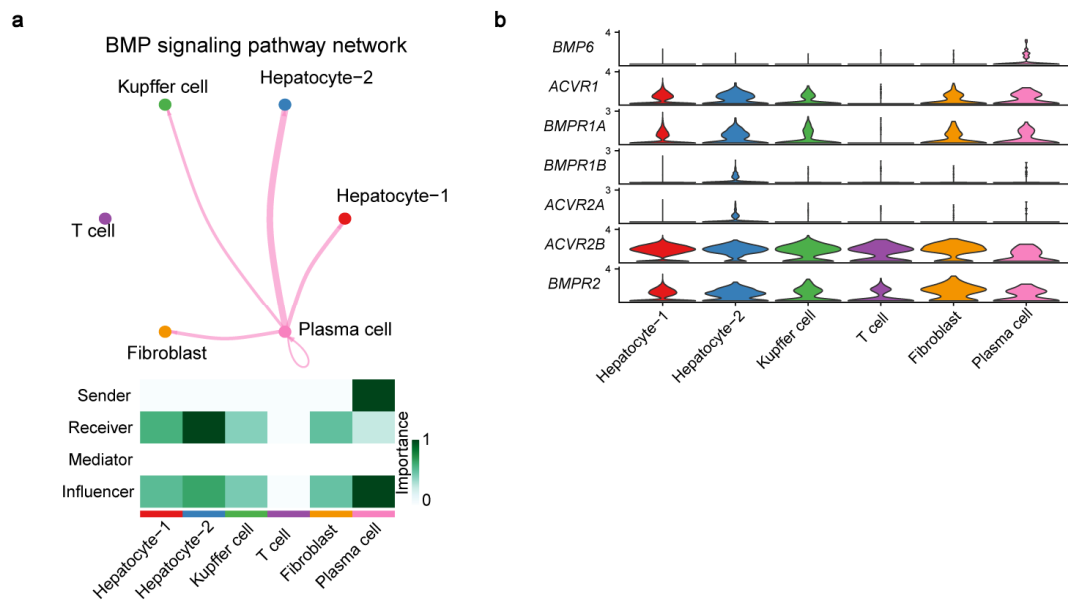

**Supplementary Figure 12. snRandom-seq detected different receptor-ligand interactions in sub-populations**

**a**, The inferred BMP signaling pathway network. Heatmap showing the relative importance of each cell cluster based on the computed four network centrality measures of BMP signaling network. **b**, Expression of BMP signaling network-related receptors and ligands.

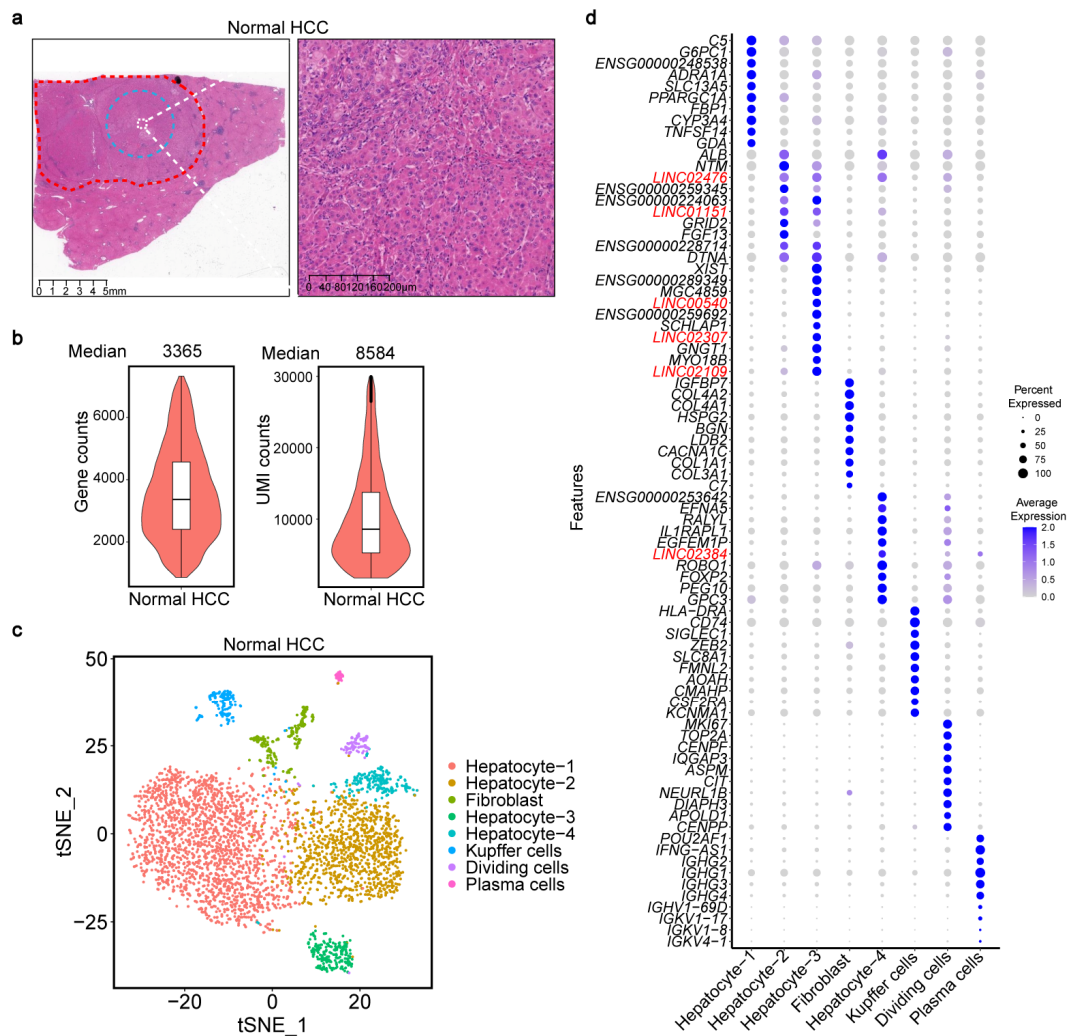

**Supplementary Figure 13. snRandom-seq detected different lncRNAs in subpopulations of human normal HCC FFPE specimens.**

**a**, Histological appearance of normal HCC at low magnification (left, Scale bar, 5 mm.) and high magnification (right, Scale bar, 200  $\mu$ m). Red broken line: tumorous area. Blue broken line: sampling area. White broken line: magnified area. **b**, Violin plots and box plots showing the number of genes and UMIs detected in normal HCC FFPE specimens by snRandom-seq. Normal HCC nuclei:  $n=6046$ . Data are presented as median values. Data in the box plot correspond to the first and third quartiles (lower and upper hinges) and median (center). Data in the box plot correspond to the first (lower hinges) quartiles, third quartiles (upper hinges), and median (center). The upper whisker extends from the hinge to the maxima no further than  $1.5 \times \text{IQR}$  from the hinge. The lower whisker extends from the hinge to

the minima at most  $1.5 * \text{IQR}$  of the hinge. **c**, t-SNE map of nuclei isolated from the FFPE sample based on their gene expressions. Eight cell types, including four hepatocellular subtypes, were annotated and shown. **d**, Top ten markers of each of the eight cell types. Red font: lncRNAs.



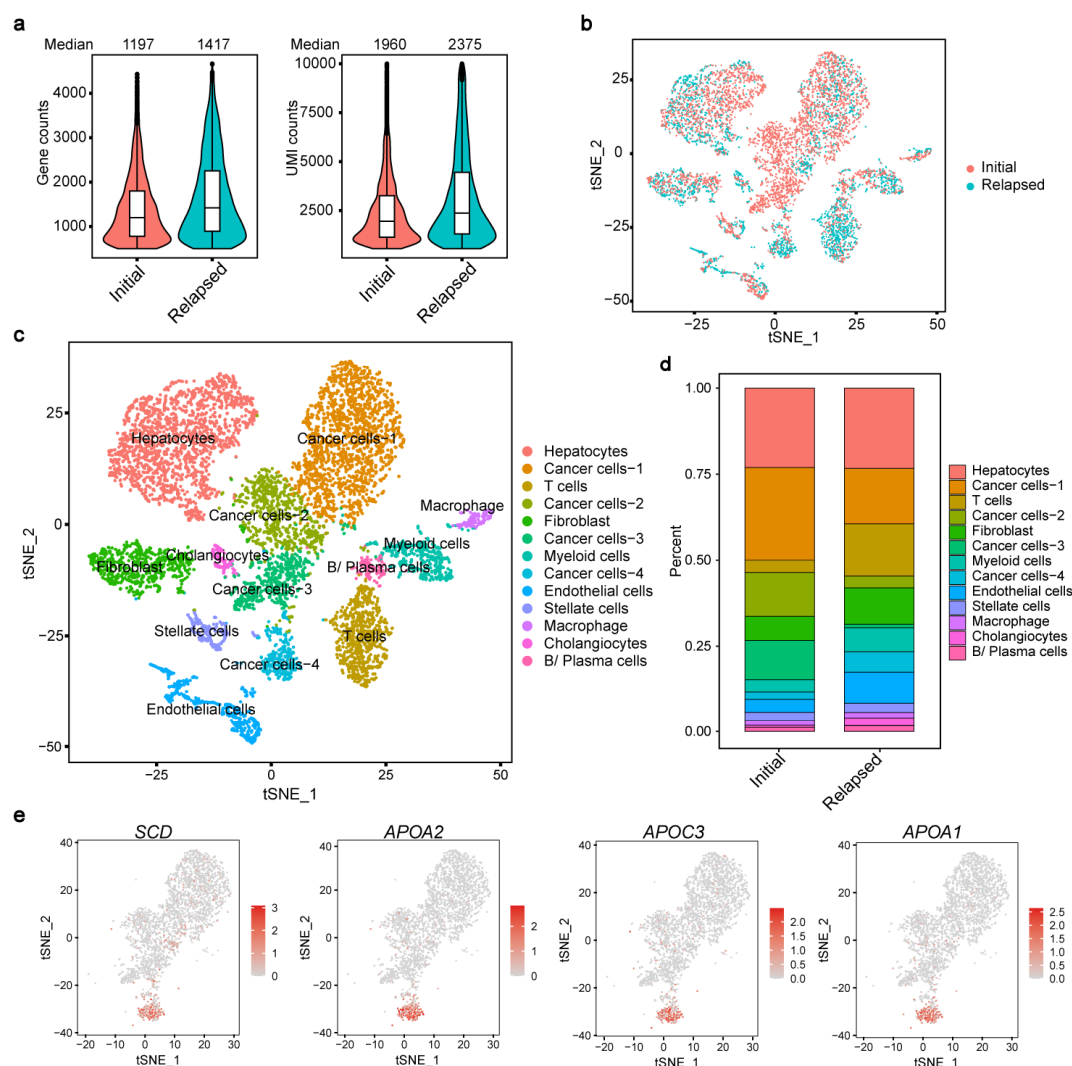

**Supplementary Figure 14. snRandom-seq revealed cell heterogeneity of initial and relapsed FFPE specimens.**

**a**, Violin plots and box plots showing the number of genes and UMIs detected in initial and relapsed FFPE specimens from a same colorectal cancer liver metastasis patient (CRLM) by snRandom-seq. Initial CRLM nuclei:  $n = 4556$ . Relapsed CRLM nuclei:  $n = 3587$ . Data are presented as median values. Data in the box plot correspond to the first (lower hinges) quartiles, third quartiles (upper hinges), and median (center). The upper whisker extends from the hinge to the maxima no further than  $1.5 \times \text{IQR}$  from the hinge. The lower whisker extends from the hinge to the minima at most  $1.5 \times \text{IQR}$  of the hinge.

**b-c**, t-SNE map of integrated nuclei from initial and relapsed FFPE specimens colored by groups (initial,

relapsed) (**b**) and cell types (hepatocytes, cancer cells, T cells, fibroblasts, myeloid cells, endothelial cells, stellate cells, macrophages, cholangiocytes, B/ plasma cells) (**c**). **d**, Percent of cells in the different cell types. **e**, Expression levels of lipid metabolism related genes (*SCD*, *APOA2*, *APOC3*, and *APOA1*) in cancer cells.

## Supplementary Tables

**Supplementary Table 1: Primers**

| Primers list          | Sequence                                                                                                                                                                |
|-----------------------|-------------------------------------------------------------------------------------------------------------------------------------------------------------------------|
| Block primer          | GAGAATGTGAGTGAAGATGTATGGTGANNNNNNN                                                                                                                                      |
| Random primer 1       | GGAGTTGGAGTGAGTGGATGAGTGATGGAAGGAATNNNNNNN                                                                                                                              |
| Random primer 2       | GGAGTTGGAGTGAGTGGATGAGTGATGGATGAATGNNNNNNN                                                                                                                              |
| Random primer 3       | GGAGTTGGAGTGAGTGGATGAGTGATGGATATGTGNNNNNNN                                                                                                                              |
| Random primer 4       | GGAGTTGGAGTGAGTGGATGAGTGATGGTGGTGTANNNNNNN                                                                                                                              |
| Random primer 5       | GGAGTTGGAGTGAGTGGATGAGTGATGGTAGGTTANNNNNNN                                                                                                                              |
| oligo(dT) primer 1    | GGAGTTGGAGTGAGTGGATGAGTGATGGAAGGAATTTTTTTTTTTTTTTT                                                                                                                      |
| oligo(dT) primer 2    | GGAGTTGGAGTGAGTGGATGAGTGATGGATGAATGTTTTTTTTTTTTTTT                                                                                                                      |
| oligo(dT) primer 3    | GGAGTTGGAGTGAGTGGATGAGTGATGGATATGTGTTTTTTTTTTTTTTT                                                                                                                      |
| oligo(dT) primer 4    | GGAGTTGGAGTGAGTGGATGAGTGATGGTGGTGTATTTTTTTTTTTTTTTT                                                                                                                     |
| oligo(dT) primer 5    | GGAGTTGGAGTGAGTGGATGAGTGATGGTAGGTTATTTTTTTTTTTTTTTT                                                                                                                     |
| Barcoded beads primer | /5Acryd/ATTATATATAT U GTG AGT GAT GGT TGA GGA TGT GTG GAGATA<br>[10 bases barcode1] TGGT [10 bases barcode2] GAGA [10 bases barcode3]<br>NNNNNNNNTTTTTTTTTTTTTTTTTTTTTT |
| PCR primer 1          | GGAGTTGGAGTGAGTGGATGAGTGATG                                                                                                                                             |
| PCR primer 2          | GTG AGT GAT GGT TGA GGA TGT GTG GAG ATA                                                                                                                                 |

**Supplementary Table 1: Primers**

List of primers used in snRandom-seq. Block primer was used for DNA blocking. Random primer 1-5 and oligo(dT) primer 1-5 were used for reverse transcription. Barcoded beads primer was the structure of the primers crosslinking with beads. The sequences of barcode1, barcode2, and barcode3 were provided in Supplementary Table 2. PCR primer 1 and PCR primer 2 were used for PCR amplification.

**Supplementary Table 2: Barcode sequences**

| <b>Barcode 1</b> | <b>Barcode 2</b> | <b>Barcode 3</b> |
|------------------|------------------|------------------|
| GATGTACATG       | ATAGAAACGA       | GCTTTTCTTG       |
| TTCAGATTCT       | TCCGTGCAAG       | CTTTAAGCAT       |
| CGTACTACGC       | AATGGGACAC       | GAAATATTGT       |
| GCTATTATAG       | TATTAGGCGA       | GGCGGAAACG       |
| CAGAAGGAAC       | CAATCATCAC       | AATGGGTATG       |
| AGACTTTTAA       | CAGTTTACT        | CGGCAATTGA       |
| GGCAACTGTG       | CTTTCTAGAT       | CTCGAGGAAT       |
| AAATTCGCGG       | TGTGATACCT       | CCTATTGTCT       |
| CTTAGACACT       | TGTTAACAAC       | GAGGCTCCTA       |
| AGCGGACTAT       | TTGCTTTCAG       | ACTCAAGGGA       |
| GAGACGCTAC       | CAGGAACTAA       | ACATCCTGCT       |
| GTCATCGTGC       | TCGGGCGGAT       | ATTATGGTAG       |
| TCATTAACAG       | ACGTATAGTG       | TACCGGATTA       |
| GCTTCGCTTA       | TACTTAAGGC       | CAATTTGAAC       |
| CTGGCAAAGA       | CATGCGGGTG       | TTTATAGACC       |
| TCGCTTGAAG       | TCGCACTCCG       | ATCACTCGGT       |
| ATGAACTTTG       | GAAACTGAAA       | ACTACTAATA       |
| CAGAGATACG       | TACAGGCGCA       | CCGGAGGATA       |
| GGCTGATAAA       | GTTGGCATT        | GACGGGAGGT       |
| TATTTGTCGC       | GTTTTAGGAA       | TCTGGAATAG       |
| TTAAGGCAAA       | AGATTGGCGG       | TGGAGGGAGC       |
| ACAGTATTAT       | GAGCGGGTTT       | GCTTGGCAAC       |
| TGGATGCTAT       | CGGGAAAGGG       | GAGGAATCCT       |
| TCGAATTTTCG      | TTCTTAGGCG       | AAGTAAACGG       |
| TACTATGGCG       | AACACAATAA       | TTTTGTGGTG       |
| TAGCTTAGTG       | TTCCGGCGAG       | TCATTGATTG       |
| GTCAGGCATG       | TTTGTTTTAT       | CAGTATCATC       |
| GGTTGGTGGT       | GCAGGTGCAG       | CACATGGTGT       |
| ACATGTAGCT       | ATAAGGACCT       | GTATAGAGTG       |
| GCGAACAATG       | TCAGTTATCC       | TCGGGTAATC       |
| TGTTGCTTGC       | AATGGAATGT       | AATTAAGAGC       |
| TAACAGCAAT       | TGTAATTGAT       | TCACAGCACA       |
| GTTTGGACTC       | TCAGTGGGTT       | AATTACCTCT       |
| CATTATGCTA       | GTGGACGTTG       | TGTTCATAGA       |
| GAGTAAGTGA       | CTCCTGCAAA       | CACGGTGTAG       |
| GAGCGGTGTA       | TTCGGATTCC       | GCCGAGGTGT       |
| CGTAAGTCGA       | AATCGGGTCA       | ATGAGGCTTT       |

|             |             |            |
|-------------|-------------|------------|
| TGGCACGTTT  | AGTCGCCGAC  | TGATGGCGGA |
| GAAATCTTTT  | CATAAGAAGT  | CGCTCCTGGT |
| AACAACGCAA  | AGGCAGGAAA  | TCAAGGCCTG |
| ATGTTGTGGC  | CTTATCCTTG  | ATTAAAGGCT |
| TAACTCATTC  | GGTCGAAGGG  | CGGAAAGAGT |
| TCGACTATAT  | CAAGAGGTGA  | ACAATAGGCG |
| TATCAGTCTG  | CTACTGGTGG  | TCCGACCGTC |
| CTATATGTAG  | TATGTTCATC  | GAAGATACAA |
| TGCAATACGG  | AGGCTTG TTC | CTAAAGGACG |
| AAACTGGTGT  | TCGACAGCAG  | TATAAAGGAA |
| AATTAGGCGT  | GTAAATGGGA  | ACAGGAGTGA |
| ACTG TTCAGG |             |            |
| CAGTATTGTT  |             |            |
| GTACTATAGT  |             |            |
| ACAGACATTT  |             |            |
| GTCTTTGGAT  |             |            |
| CTTGATCTAT  |             |            |
| GTATGTCAGG  |             |            |
| TATTCAACTG  |             |            |
| TTTTGACGGA  |             |            |
| ATGGTAGAAA  |             |            |
| GTGCTCTATC  |             |            |
| GTTATAGTTG  |             |            |
| AGGATCTTAC  |             |            |
| TGCATTTGAA  |             |            |
| AATTCGGATA  |             |            |
| GGTTGAGAGC  |             |            |
| CAAGGCTCAT  |             |            |
| GAATGGAAGC  |             |            |
| CTTCTATATG  |             |            |
| TCTGGATTAC  |             |            |
| TTGATCAGTA  |             |            |
| ATTTTTGTCG  |             |            |
| TACGACTGAA  |             |            |
| AAAGTTGCAA  |             |            |
| GGCGTGCTTT  |             |            |
| CGGCGGATTT  |             |            |
| CGACAAAGTG  |             |            |
| TGCGTAATTC  |             |            |
| CAAATGTCGT  |             |            |

|            |  |  |
|------------|--|--|
| CAGCTAGCTT |  |  |
| ACACGGCTCT |  |  |
| ATTATGACTG |  |  |
| ACGCATAGAC |  |  |
| TGGAAGGACT |  |  |
| TAAGTAGATA |  |  |
| CACAAGTATA |  |  |
| TAAGAATGCG |  |  |
| ATATGTGTGA |  |  |
| ACACAGTGTG |  |  |
| AGCACTGTAT |  |  |
| ACTATGCGAG |  |  |
| CTACATGCTC |  |  |
| CTTCTGGTGG |  |  |
| GGATGCTCGA |  |  |
| CAGCGAAGGA |  |  |
| GTAAAGACGT |  |  |
| TTGCTACAAC |  |  |
| TGGAAACGGT |  |  |

**Supplementary Table 2: Barcode sequences**

Barcode 1, 2 and 3 were used for the three rounds of split-and-pool-based ligation in the barcoded beads synthesis of snRandom-seq (**Supplementary Fig. 2c**).

## **Supplementary Notes**

### **Supplementary Note 1: snRandom-seq Protocol 1.0**

Ziye Xu, Wang Lab

Department of Laboratory Medicine, the First Affiliated Hospital,  
Zhejiang University School of Medicine

#### **1. Single nuclei isolation from FFPE samples**

Dewax and rehydrate the FFPE samples using the following program:

Xylene I    5min

Xylene II   5min

100% ethanol I   3min

100% ethanol II   3min

95% ethanol    1min

90% ethanol    1min

85% ethanol    1min

80% ethanol    1min

70% ethanol    1min

50% ethanol    1min

30% ethanol    1min

Wash the dewaxed and rehydrated samples twice with 1 mL of pre-cold wash buffer.

FFPE nuclei lysis buffer:

10% Triton X-100        20  $\mu$ L

RNase Inhibitor (200 U/ $\mu$ L)        1  $\mu$ L

1X PBS        2 mL

Homogenize the dewaxed and rehydrated samples with Dounce homogenizer (working volume: 2 mL) with the presence of 1 mL of pre-cold FFPE nuclei lysis buffer.

10 mg/mL proteinase K:

proteinase K        100 mg

ddH<sub>2</sub>O        10 mL

After homogenization, add 1 mL of FFPE nuclei lysis buffer to rinse the homogenizer, then add 100  $\mu$ L of 10 mg/mL proteinase K into the lysis buffer and put on PCR block 37°C for 5 min, then quickly put

on ice.

Filter the isolated nuclei through a 20- $\mu$ m cell strainer and washed twice with wash buffer.

## **2. *In situ* DNA block**

Count the FFPE nuclei under the microscope, then dilute with 1X PBS. A total of 100,000~1000,000 FFPE nuclei were used for *in situ* DNA blocking. The DNA Polymerase kit was ordered from M20 Genomics.

Make the following *in situ* DNA block reaction mix:

|                                     |              |
|-------------------------------------|--------------|
| Nuclei (100,000~1000,000) in 1X PBS | 25.5 $\mu$ L |
| 10 $\mu$ M block primer             | 5 $\mu$ L    |
| DNA Polymerase                      | 2 $\mu$ L    |
| 5X DNA polymerization buffer        | 10 $\mu$ L   |
| 100 mM dNTP                         | 5 $\mu$ L    |
| RNase Inhibitor (200 U/ $\mu$ L)    | 2.5 $\mu$ L  |

Mix well and then put on PCR block 37°C for 30 min, then quickly put on ice.

PBST buffer:

|                                  |           |
|----------------------------------|-----------|
| T-ween 20                        | 5 $\mu$ L |
| RNase Inhibitor (200 U/ $\mu$ L) | 5 $\mu$ L |
| 1X PBS                           | 10 mL     |

Wash the nuclei with 1 mL of PBST buffer three times, then resuspend with 1X PBS.

## **3. *In situ* reverse transcription**

The reverse transcription kit was ordered from M20 Genomics.

Make the following *in situ* reverse transcription reaction mix:

|                                     |              |
|-------------------------------------|--------------|
| Nuclei (100,000~1000,000) in 1X PBS | 22.5 $\mu$ L |
| 10 $\mu$ M random primer            | 5 $\mu$ L    |
| 10 $\mu$ M oligo(dT) primer         | 5 $\mu$ L    |
| Reverse Transcriptase               | 2.5 $\mu$ L  |
| 5X reverse transcription buffer     | 10 $\mu$ L   |
| 100 mM dNTP                         | 2.5 $\mu$ L  |
| RNase Inhibitor (200 U/ $\mu$ L)    | 2.5 $\mu$ L  |

Mix well and then put on PCR block to run following program:



12 cycles of  
8°C 10s  
15°C 15s  
20°C 15s  
30°C 30s  
42°C 1min  
End cycles  
42°C 30min  
4 °C Forever

Wash the nuclei with 1 mL of PBST buffer three times, then resuspend with 1X PBS.

#### **4. dA tailing**

The TdT reaction kit was ordered from NEB.

Prepare the following dA tailing reaction mix:

Nuclei (100,000~1000,000) in 1X PBS 39 µL  
10X TdT reaction buffer 5 µL  
10 X CoCl<sub>2</sub> 5 µL  
TdT enzyme (20,000 U/mL) 0.5 µL

Mix well and then put on PCR block 37°C for 30 min, wash with 1 mL of PBST three times, then resuspend with 1X PBS.

#### **5. Droplet barcoding**

Count the nuclei under microscope, then dilute with a 30% density gradient solution at 1000 nuclei/uL.

The 2X DNA extension reaction mix was ordered from M20 Genomics. The barcoded beads were customized with M20 Genomics company.

Encapsulate nuclei (40 uL), 2X DNA extension reaction mix (40 uL) and barcoded beads (10 uL) into droplets using the microfluidic platform. Then, split the emulsions into 2 PCR tubes and then put on PCR block to run following program:

37°C 1hour  
50°C 30min  
60°C 30min  
75°C 20min

4 °C    Forever

After the barcoding reaction, mix the droplets with PFO buffer. Take out the aqueous phase and then use Ampure XP beads to purify DNA fragments. Elute the purified DNA fragments with 40 uL ddH<sub>2</sub>O.

Prepare the following PCR amplification reaction mix:

10X PCR reaction buffer        5 µL

10 uM Primer1            1 µL

10 uM Primer2            1 µL

cDNA Template        35~40 µL

Add ddH<sub>2</sub>O to total 50 µL

Mix well and then put on PCR block to run following program:

95°C    1min

20 cycles of

95 °C    30s

60 °C    30s

72 °C    2min

End cycles

72 °C    5min

4 °C    Forever

Use Ampure XP beads to purify the PCR products.

## **6. Library preparation**

After amplification and purification, VAHTS Universal DNA Library Prep Kit for Illumina V3 was used to construct library. Library sequencing was performed using the NovaSeq 6000 and S4 Reagent Kit with paired end reads of 150.

## Supplementary References

1. Habib, N. et al. Massively parallel single-nucleus RNA-seq with DroNc-seq. *Nat. Methods* **14**, 955-958 (2017).
2. Hu, P. et al. Dissecting Cell-Type Composition and Activity-Dependent Transcriptional State in Mammalian Brains by Massively Parallel Single-Nucleus RNA-Seq. *Mol. Cell* **68**, 1006-1015.e1007 (2017).
3. Chung, H. et al. SnFFPE-Seq: towards scalable single nucleus RNA-Seq of formalin-fixed paraffin-embedded (FFPE) tissue. *bioRxiv*, 2022.2008.2025.505257 (2022).
4. Vallejo, A.F. et al. snPATHO-seq: unlocking the FFPE archives for single nucleus RNA profiling. *bioRxiv*, 2022.2008.2023.505054 (2022).
